# Supplementary material
Source: Springer Nature journal article supplement (https://www.springermedizin.de/resource/supplementary/12943_2012_1116_MOESM3_ESM.pdf/9552528)

**A**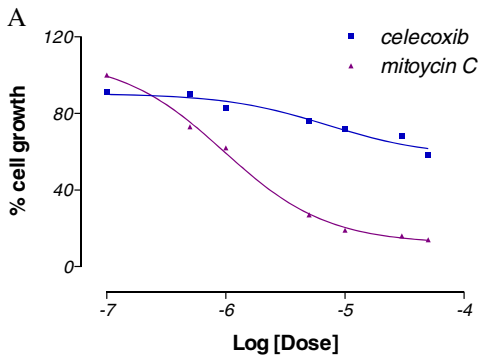**B**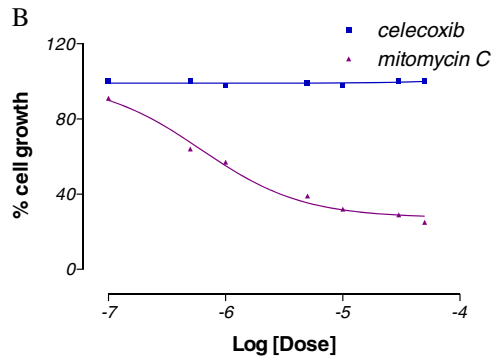**C**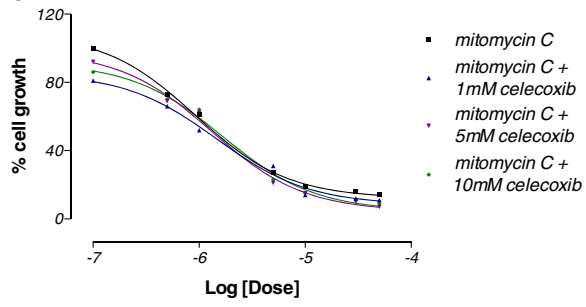**D**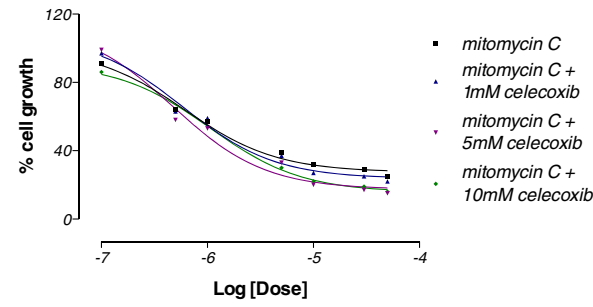**B**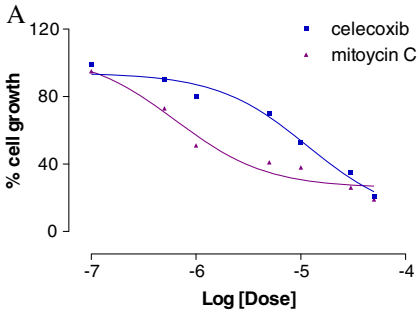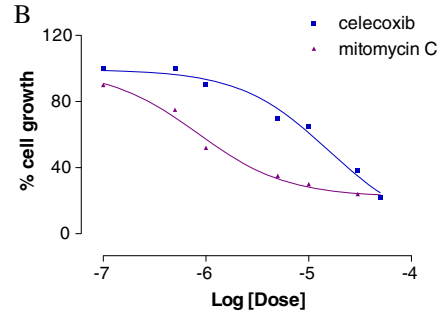**C**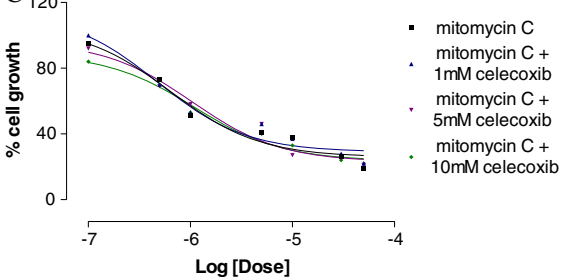**D**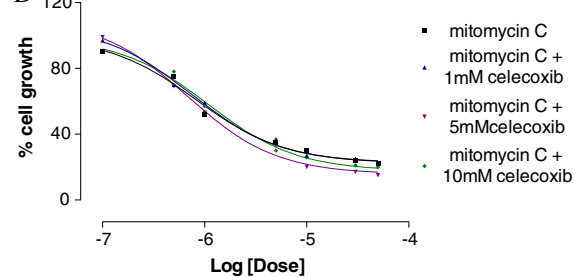

Supplement: MOESM3 [file 9552528]
